# Supplementary material for: Biodiversity and trophic ecology of hydrothermal vent fauna associated with tubeworm assemblages on the Juan de Fuca Ridge
Source: Copernicus journal article supplement (doi:10.5194/bg-2017-411), 2017-10-12
Supplement: Supplementary file 1 [file bg-2017-411-supplement.zip]

1   **Video legend (supplementary information)**

2   **Video S1.** A polynoid polychaete attacking a *Ridgeia piscesae* tubeworm branchial plume  
3   with its proboscis. Footage recorded by the ecological observatory module TEMPO-mini at  
4   2196 m depth on the Grotto hydrothermal vent edifice (Main Endeavour, Juan de Fuca  
5   Ridge).
