# Supplementary material for: Biodiversity and trophic ecology of hydrothermal vent fauna associated with tubeworm assemblages on the Juan de Fuca Ridge
Source: Copernicus journal article supplement (doi:10.5194/bg-2017-411), 2017-10-12
Supplement: Supplementary file [file bg-2017-411-AC3-supplement.pdf]

**Table 1.** Trophic guild and nutritional modes of macrofaunal species associated with the *Ridgeia piscesae* tubeworm assemblages of the Grotto hydrothermal edifice (Main Endeavour Field, Juan de Fuca Ridge). An asterisk (\*) marks the original description of the species.

| Species                                    | Trophic guild - Nutritional mode                                             | Reference(s)                                                                                     |
|--------------------------------------------|------------------------------------------------------------------------------|--------------------------------------------------------------------------------------------------|
| <b>Annelida</b>                            |                                                                              |                                                                                                  |
| <b>Polychaeta</b>                          |                                                                              |                                                                                                  |
| Siboglinidae                               |                                                                              |                                                                                                  |
| <i>Ridgeia piscesae</i>                    | Symbiotic                                                                    | Jones, 1985*; Southward et al., 1995; Bergquist et al., 2007; This study                         |
| Maldanidae                                 |                                                                              |                                                                                                  |
| <i>Nicomache venticola</i>                 | Bacterivore - Surface deposit feeder or grazer                               | Blake and Hilbig, 1990*; Bergquist et al., 2007; This study                                      |
| Dorvilleidae                               |                                                                              |                                                                                                  |
| <i>Ophryotrocha globopalpata</i>           | Predator                                                                     | Blake and Hilbig, 1990*; Bergquist et al., 2007; This study                                      |
| Orbinidae                                  |                                                                              |                                                                                                  |
| <i>Berkeleyia</i> sp. nov.                 | Scavenger/detritivore - Suspension feeder                                    | Jumars et al., 2015; This study                                                                  |
| Hesionidae                                 |                                                                              |                                                                                                  |
| <i>Hesiospina</i> sp. nov. <sup>(1)</sup>  | Predator                                                                     | Bonifácio et al., <i>in preparation</i> *; This study                                            |
| Phyllodocidae                              |                                                                              |                                                                                                  |
| <i>Protomystides verенаe</i>               | Predator                                                                     | Blake and Hilbig, 1990*; Bergquist et al., 2007; This study                                      |
| Polynoidae                                 |                                                                              |                                                                                                  |
| <i>Branchinotogluma tunnicliffae</i>       | Predator                                                                     | Pettibone, 1988*; Bergquist et al., 2007; This study                                             |
| <i>Branchinotogluma</i> sp.                | Predator                                                                     | -                                                                                                |
| <i>Lepidonotopodium piscesae</i>           | Predator                                                                     | Pettibone, 1988*; Levesque et al., 2006; Bergquist et al., 2007; This study                      |
| <i>Levensteiniella kincaidi</i>            | Predator                                                                     | Pettibone, 1985*; Bergquist et al., 2007; This study                                             |
| Sigalionidae                               |                                                                              |                                                                                                  |
| <i>Pholoe courtneyae</i>                   | Predator                                                                     | Blake, 1995*; Sweetman et al., 2013                                                              |
| Syllidae                                   |                                                                              |                                                                                                  |
| <i>Sphaerosyllis ridgensis</i>             | Predator                                                                     | Blake and Hilbig, 1990*; Bergquist et al., 2007; This study                                      |
| Alvinellidae                               |                                                                              |                                                                                                  |
| <i>Paralvinella dela</i>                   | Bacterivore - Surface deposit feeder or grazer; suspension feeder            | Detinova et al., 1988*; This study                                                               |
| <i>Paralvinella palmiformis</i>            | Bacterivore - Surface deposit feeder or grazer; suspension feeder            | Desbruyères and Laubier, 1986*; Desbruyères and Laubier, 1991; Levesque et al., 2003; This study |
| <i>Paralvinella pandorae</i>               | Bacterivore - Surface deposit feeder or grazer; suspension feeder            | Desbruyères and Laubier, 1986*; Desbruyères and Laubier, 1991; Levesque et al., 2003; This study |
| <i>Paralvinella sulfincola</i>             | Bacterivore - Surface deposit feeder or grazer; suspension feeder            | Tunnicliffe et al., 1993*; Levesque et al., 2003; This study                                     |
| Ampharetidae                               |                                                                              |                                                                                                  |
| <i>Amphisamytha caridareii</i>             | Scavenger/detritivore - Surface deposit feeder or grazer                     | Stiller et al., 2013*; McHugh and Tunnicliffe, 1994; Bergquist et al., 2007; This study          |
| Ctenodrilidae                              |                                                                              |                                                                                                  |
| <i>Raricirrus</i> sp.                      | Bacterivore - Surface deposit feeder or grazer                               | Jumars et al., 2015                                                                              |
| Spionidae                                  |                                                                              |                                                                                                  |
| <i>Prionospio</i> sp.                      | Bacterivore - Surface deposit feeder or grazer                               | Jumars et al., 2015                                                                              |
| <b>Mollusca</b>                            |                                                                              |                                                                                                  |
| <b>Aplacophora</b>                         |                                                                              |                                                                                                  |
| Simrothiellidae                            |                                                                              |                                                                                                  |
| <i>Helicoradomenia juani</i>               | Predator                                                                     | Scheltema and Kuzirian, 1991*; Bergquist et al., 2007; This study                                |
| <b>Gastropoda</b>                          |                                                                              |                                                                                                  |
| Buccinidae                                 |                                                                              |                                                                                                  |
| <i>Buccinum thermophilum</i>               | Scavenger/detritivore - Surface deposit feeder or grazer                     | Harasewych and Kantor, 2002*; Martell et al., 2002; This study                                   |
| Provannidae                                |                                                                              |                                                                                                  |
| <i>Provanna variabilis</i>                 | Bacterivore - Surface deposit feeder or grazer                               | Warén and Bouchet, 1986*; Bergquist et al., 2007; This study                                     |
| Peltospiridae                              |                                                                              |                                                                                                  |
| <i>Depressigyra globulus</i>               | Bacterivore - Surface deposit feeder or grazer                               | Warén and Bouchet, 1989*; Bergquist et al., 2007; This study                                     |
| Clypeosectidae                             |                                                                              |                                                                                                  |
| <i>Clypeosectus curvus</i>                 | Predator                                                                     | McLean, 1989*; Bergquist et al., 2007; This study                                                |
| Lepetodrilidae                             |                                                                              |                                                                                                  |
| <i>Lepetodrilus fucensis</i>               | Symbiotic; Bacterivore - Surface deposit feeder or grazer; suspension feeder | McLean, 1988*; Fox et al., 2002; Bates et al., 2007; Bergquist et al., 2007; This study          |
| <b>Arthropoda</b>                          |                                                                              |                                                                                                  |
| <b>Arachnida</b>                           |                                                                              |                                                                                                  |
| Halacaridae                                |                                                                              |                                                                                                  |
| <i>Copidognathus papillatus</i>            | Predator                                                                     | Krantz, 1982*; Bergquist et al., 2007; This study                                                |
| <b>Amphipoda</b>                           |                                                                              |                                                                                                  |
| Alicellidae                                |                                                                              |                                                                                                  |
| <i>Paralicella cf. vaporalis</i>           | -                                                                            | Barnard and Ingram, 1990*                                                                        |
| Calliopidae                                |                                                                              |                                                                                                  |
| <i>Oradarea cf. walkeri</i>                | -                                                                            | Shoemaker, 1930*                                                                                 |
| <i>Letpamphopus</i> sp.                    | -                                                                            | -                                                                                                |
| <b>Crustacea</b>                           |                                                                              |                                                                                                  |
| Philomedidae                               |                                                                              |                                                                                                  |
| <i>Euphilomedes climax</i>                 | Bacterivore - Surface deposit feeder or grazer                               | Kornicker, 1991*; This study                                                                     |
| Cytherudidae                               |                                                                              |                                                                                                  |
| <i>Xylocythere</i> sp. nov. <sup>(2)</sup> | Bacterivore - Surface deposit feeder or grazer                               | Tanaka et al., <i>in preparation</i> *; Maddocks and Steinbeck, 1987; This study                 |
| <b>Pycnogonida</b>                         |                                                                              |                                                                                                  |
| Ammotheidae                                |                                                                              |                                                                                                  |
| <i>Sericosura verенаe</i>                  | Bacterivore - Surface deposit feeder or grazer                               | Child, 1987*; Bergquist et al., 2007; This study                                                 |
| <i>Sericosura venticola</i>                | Bacterivore - Surface deposit feeder or grazer                               | Child, 1987*; Bergquist et al., 2007; This study                                                 |
| <i>Sericosura cf. dissita</i>              | Bacterivore - Surface deposit feeder or grazer                               | Child, 2000*; This study                                                                         |
| <b>Nemertea</b>                            |                                                                              |                                                                                                  |
| <b>Unidentified</b>                        | Predator                                                                     | -                                                                                                |
| <b>Echinodermata</b>                       |                                                                              |                                                                                                  |
| <b>Ophiuroidea</b>                         | -                                                                            | -                                                                                                |

<sup>(1)</sup>This species refers to *Hesiospina legendrei* that is currently under description (Bonifácio et al., *in preparation*)

<sup>(2)</sup>This species refers to *Xylocythere sarrazinae* that is currently under description (Tanaka et al., *in preparation*)

**Table 2.** Percentage abundance  $\times 100$  (% Ab.), faunal density (D, ind  $m^{-3}$ ), volume (V, ind  $m^{-3}$ ) and relative biomass  $\times 100$  (% Biom.) of the different macrofaunal taxa ( $>250 \mu m$ ) identified in the 6 sampling units (S1 to S6) on the Grotto edifice. The taxa were identified to the lowest possible taxonomical level.

| Species                    | S1 - Assemblage V low-flow |                    |                    | S2 - Assemblage V low-flow |                    |                    | S3 - Assemblage V low-flow |                    |                    | S4 - Assemblage IV |                    |                    | S5 - Assemblage V low-flow |                    |                    | S6 - Assemblage III |                    |                    |           |
|----------------------------|----------------------------|--------------------|--------------------|----------------------------|--------------------|--------------------|----------------------------|--------------------|--------------------|--------------------|--------------------|--------------------|----------------------------|--------------------|--------------------|---------------------|--------------------|--------------------|-----------|
|                            | % Ab.                      | D. (ind $m^{-3}$ ) | V. (ind $m^{-3}$ ) | % Ab.                      | D. (ind $m^{-3}$ ) | V. (ind $m^{-3}$ ) | % Ab.                      | D. (ind $m^{-3}$ ) | V. (ind $m^{-3}$ ) | % Ab.              | D. (ind $m^{-3}$ ) | V. (ind $m^{-3}$ ) | % Ab.                      | D. (ind $m^{-3}$ ) | V. (ind $m^{-3}$ ) | % Ab.               | D. (ind $m^{-3}$ ) | V. (ind $m^{-3}$ ) |           |
| <b>Annelida</b>            |                            |                    |                    |                            |                    |                    |                            |                    |                    |                    |                    |                    |                            |                    |                    |                     |                    |                    |           |
| <b>Polychaeta</b>          |                            |                    |                    |                            |                    |                    |                            |                    |                    |                    |                    |                    |                            |                    |                    |                     |                    |                    |           |
| Maldanidae                 | 0.1                        | 8                  | 1604.5             | 0.2                        | 0.1                | 14.1               | 7033.6                     | 0.1                | 0.2                | 35.5               | 6363.3             | 1.1                | 0                          | 0                  | 0                  | 0                   | 0                  | 0                  |           |
| Nicomachea ventricola      | 0.1                        | 4.2                | 849.5              | <0.1                       | 0.1                | 9.8                | 4893                       | <0.1               | 1.3                | 202                | 3624.1             | <0.1               | <0.1                       | 1.8                | 934.6              | <0.1                | 10                 | 1851.9             | <0.1      |
| Dorvilleidae               | 0                          | 0                  | 0                  | 0                          | 0                  | 0                  | 0                          | 0                  | <0.1               | 6.3                | 1137.8             | <0.1               | 0                          | 0                  | 0                  | 0                   | 0                  | 0                  | 0         |
| Ophryotrocha globoparata   | 0                          | 0                  | 0                  | 0                          | 0                  | 0                  | 0                          | 0                  | 0.1                | 14.3               | 2570.6             | <0.1               | 0                          | 0                  | 0                  | 0                   | 0                  | 0                  | 0         |
| Berkeleya sp. nov.         | 0.1                        | 9.8                | 1982.1             | <0.1                       | 0.1                | 10.4               | 5198.8                     | <0.1               | 0.1                | 0.2                | 42.1               | <0.1               | 0                          | 0                  | 0                  | 0                   | 0                  | 0                  | 0         |
| Hesoniidae                 | <0.1                       | 0.5                | 94.4               | <0.1                       | <0.1               | 0.6                | 305.8                      | <0.1               | <0.1               | 0.2                | 42.1               | <0.1               | 0                          | 0                  | 0                  | 0                   | 0                  | 0                  | 0         |
| <b>Hydratidae</b>          |                            |                    |                    |                            |                    |                    |                            |                    |                    |                    |                    |                    |                            |                    |                    |                     |                    |                    |           |
| Protospiriferus verreauxi  | <0.1                       | 0.7                | 141.6              | <0.1                       | 0.1                | 9.2                | 4587.2                     | <0.1               | <0.1               | 0                  | 0                  | 0                  | 0                          | 0                  | 0                  | 0                   | 0                  | 0                  | 0         |
| Branchiostoma lanceiflorae | 0                          | 0                  | 0                  | 0                          | 0                  | 0                  | 0                          | 0                  | 0                  | 0                  | 0                  | 0                  | 0                          | 0                  | 0                  | 0                   | 0                  | 0                  | 0         |
| Branchiostoma sp.          | 0                          | 0                  | 0                  | 0                          | 0                  | 0                  | 0                          | 0                  | 0                  | 0                  | 0                  | 0                  | 0                          | 0                  | 0                  | 0                   | 0                  | 0                  | 0         |
| Levidonapodulum piscosae   | 0                          | 0                  | 0                  | 0                          | <0.1               | 1.2                | 611.6                      | <0.1               | <0.1               | 3.8                | 674.3              | <0.1               | 0.2                        | 43.9               | 23364.5            | 0.9                 | 0.1                | 50.1               | 9259.3    |
| Levensteinella kincaidii   | 0.1                        | 8.2                | 1651.7             | 0.1                        | 0.1                | 10.4               | 5198.8                     | <0.1               | <0.1               | 4                  | 716.4              | <0.1               | <0.1                       | 3.5                | 1869.2             | <0.1                | <0.1               | 20                 | 3703.7    |
| Sigalionidae               | <0.1                       | 0.2                | 47.2               | <0.1                       | 0                  | 0                  | 0                          | 0                  | 0                  | 0                  | 0                  | 0                  | 0                          | 0                  | 0                  | 0                   | 0                  | 0                  | 0         |
| Pholoe courtneyae          | <0.1                       | 0.2                | 47.2               | <0.1                       | 0                  | 0                  | 0                          | 0                  | 0                  | 0                  | 0                  | 0                  | 0                          | 0                  | 0                  | 0                   | 0                  | 0                  | 0         |
| Syllidae                   | 3.6                        | 257.6              | 51911.3            | <0.1                       | 1                  | 170.2              | 85015.3                    | <0.1               | 1.7                | 262.6              | 47113.4            | <0.1               | 0                          | 0                  | 0                  | 0                   | 0.1                | 90.1               | 16666.7   |
| Sphaerosyllis ridgewayi    | 0                          | 0                  | 0                  | 0                          | 0                  | 0                  | 0                          | 0                  | <0.1               | 0.7                | 126.4              | <0.1               | 0                          | 0                  | 0                  | 0                   | 0                  | 0                  | 0         |
| Alvinellidae               | 0                          | 0                  | 0                  | 0                          | 0                  | 0                  | 0                          | 0                  | <0.1               | 10.3               | 1854.2             | 0.1                | 3.3                        | 726.4              | 386915.9           | 6.8                 | 0.2                | 110.2              | 20370.4   |
| Parabrydinae               | <0.1                       | 0.7                | 141.6              | <0.1                       | <0.1               | 2.5                | 1232.2                     | <0.1               | 0.1                | 17.4               | 3118.4             | <0.1               | 0.1                        | 17.6               | 9345.8             | <0.1                | 0.1                | 70.1               | 1296.3    |
| Parabrydinae               | 0                          | 0                  | 0                  | 0                          | 0                  | 0                  | 0                          | 0                  | <0.1               | 6.6                | 1179.9             | 0.1                | 0.6                        | 122.8              | 65202.6            | 0.5                 | <0.1               | 10                 | 1851.9    |
| Ampharetidae               | 26.8                       | 1932.1             | 38934.6            | 0.5                        | 24.5               | 3367.5             | 168165.4                   | 0.5                | 34.8               | 5378.8             | 964938.9           | 1.8                | 0.4                        | 80.7               | 42390.7            | <0.1                | 5.1                | 3004.6             | 55555.6   |
| Amphiprioninae             | <0.1                       | 0.2                | 47.2               | <0.1                       | 0                  | 0                  | 0                          | 0                  | <0.1               | 1.9                | 337.1              | <0.1               | 0                          | 0                  | 0                  | 0                   | 0                  | 0                  | 0         |
| Chironomidae               | <0.1                       | 0.2                | 47.2               | <0.1                       | 0                  | 0                  | 0                          | 0                  | <0.1               | 0.9                | 168.6              | <0.1               | 0                          | 0                  | 0                  | 0                   | 0                  | 0                  | 0         |
| Prionospio sp.             | <0.1                       | 2.1                | 424.7              | <0.1                       | 0                  | 0                  | 0                          | 0                  | <0.1               | 0.9                | 168.6              | <0.1               | 0                          | 0                  | 0                  | 0                   | 0                  | 0                  | 0         |
| <b>Mollusca</b>            |                            |                    |                    |                            |                    |                    |                            |                    |                    |                    |                    |                    |                            |                    |                    |                     |                    |                    |           |
| <b>Apicophora</b>          |                            |                    |                    |                            |                    |                    |                            |                    |                    |                    |                    |                    |                            |                    |                    |                     |                    |                    |           |
| Simrothiellidae            | 3.7                        | 263.7              | 53138.3            | <0.1                       | 3.4                | 461.1              | 230275.2                   | <0.1               | 5.6                | 861.9              | 154614.4           | 0.14               | 0.1                        | 17.6               | 9345.8             | <0.1                | 1.3                | 791.2              | 146296.3  |
| Gastropoda                 | 0.1                        | 9.8                | 1982.1             | 3.2                        | 0.1                | 18.4               | 9174.3                     | 1.6                | <0.1               | 2.4                | 421.4              | 0.4                | 0                          | 0                  | 0                  | 0                   | 0.1                | 50.1               | 9259.3    |
| Buccinidae                 | 1.9                        | 137                | 27607.4            | 2.2                        | 1.6                | 224.8              | 112232.4                   | 1.3                | 4.5                | 694.8              | 124652.3           | 6.8                | 0.3                        | 61.4               | 32710.3            | 0.3                 | 8.6                | 5117.8             | 946296.3  |
| Provaninae                 | 10.8                       | 779.9              | 157449.6           | 1.1                        | 14.5               | 1986               | 991743.1                   | 1.1                | 20.1               | 3105.4             | 557100.7           | 2.9                | 51.4                       | 11294.7            | 6015887.9          | 13                  | 44                 | 26179.8            | 4840740.7 |
| Pleurostomatidae           | 0.5                        | 34.7               | 6984.4             | 0.1                        | 0.2                | 20.2               | 10091.7                    | <0.1               | <0.1               | 6.8                | 1222.1             | <0.1               | 0                          | 0                  | 0                  | 0                   | 0.1                | 50.1               | 9259.3    |
| Cypraea curvata            | 42.7                       | 3083.1             | 621883.6           | 12.5                       | 39.5               | 5429.4             | 2711315                    | 10.1               | 22.8               | 3519.5             | 631394.9           | 11.5               | 43                         | 9457.6             | 5037383.2          | 19.4                | 30.1               | 17907.2            | 331111.1  |
| Lepetodrilus lucensis      | 0                          | 0                  | 0                  | 0                          | 0                  | 0                  | 0                          | 0                  | 0                  | 0                  | 0                  | 0                  | 0                          | 0                  | 0                  | 0                   | 0                  | 0                  | 0         |
| <b>Arthropoda</b>          |                            |                    |                    |                            |                    |                    |                            |                    |                    |                    |                    |                    |                            |                    |                    |                     |                    |                    |           |
| <b>Arachnida</b>           |                            |                    |                    |                            |                    |                    |                            |                    |                    |                    |                    |                    |                            |                    |                    |                     |                    |                    |           |
| Halicaridae                | 4.9                        | 349.6              | 70457.8            | <0.1                       | 1.5                | 211.9              | 105810.4                   | <0.1               | 4.9                | 754.7              | 135398.2           | <0.1               | <0.1                       | 8.8                | 4672.9             | <0.1                | <0.1               | 60.1               | 11111.1   |
| Copidognathus papillatus   | <0.1                       | 1.6                | 330.3              | <0.1                       | <0.1               | 6.1                | 3058.1                     | <0.1               | <0.1               | 3.1                | 547.8              | <0.1               | 0                          | 0                  | 0                  | 0                   | 0                  | 0                  | 0         |
| Amblypyidae                | <0.1                       | 4.7                | 943.8              | <0.1                       | 0                  | 0                  | 0                          | 0                  | 0                  | 0                  | 0                  | 0                  | 0                          | 0                  | 0                  | 0                   | 0                  | 0                  | 0         |
| Calappidae                 | 0                          | 0                  | 0                  | 0                          | 0                  | 0                  | 0                          | 0                  | 0                  | 0                  | 0                  | 0                  | 0                          | 0                  | 0                  | 0                   | 0                  | 0                  | 0         |
| Cheliferidae               | 0                          | 0                  | 0                  | 0                          | 0                  | 0                  | 0                          | 0                  | 0                  | 0                  | 0                  | 0                  | 0                          | 0                  | 0                  | 0                   | 0                  | 0                  | 0         |
| Crustacea                  | 0.7                        | 52                 | 10476.6            | <0.1                       | 10.9               | 1502.2             | 750152.9                   | 0.1                | 0.2                | 23.3               | 4171.9             | <0.1               | 0.3                        | 70.2               | 37383.2            | <0.1                | 9.1                | 5378.2             | 994444.4  |
| Phlebobranchiidae          | 2.9                        | 206.8              | 41570.6            | <0.1                       | 1.4                | 188                | 93883.8                    | <0.1               | 2.7                | 413                | 74083.4            | <0.1               | <0.1                       | 7                  | 3738.3             | <0.1                | 0.3                | 170.3              | 31481.5   |
| Cytheroidea                | 0.6                        | 42.6               | 8589.0             | <0.1                       | 0.6                | 84.5               | 42201.8                    | 0.5                | 0.7                | 113.5              | 2095.4             | 0.8                | 0.1                        | 24.6               | 13084.1            | 0.2                 | 0.6                | 360.6              | 66666.7   |
| Ammonoidea                 | 0.2                        | 15.2               | 3067.5             | <0.1                       | 0.1                | 8                  | 3975.5                     | 0.5                | <0.1               | 1.9                | 337.1              | 0.8                | <0.1                       | 1.8                | 934.6              | <0.1                | 0                  | 0                  | 0         |
| Sarcosaurus ventricola     | 0.1                        | 5.6                | 1132.6             | <0.1                       | <0.1               | 1.2                | 611.6                      | 0.5                | <0.1               | 0.7                | 126.4              | 0.8                | 0                          | 0                  | 0                  | 0                   | 0                  | 0                  | 0         |
| Sarcosaurus cf. abstrata   | <0.1                       | 1.2                | 236.0              | <0.1                       | 0                  | 0                  | 0                          | 0                  | <0.1               | 2.8                | 505.7              | <0.1               | 0                          | 0                  | 0                  | 0                   | 0                  | 0                  | 0         |
| <b>Nemertea</b>            |                            |                    |                    |                            |                    |                    |                            |                    |                    |                    |                    |                    |                            |                    |                    |                     |                    |                    |           |
| Unidentified               | <0.1                       | 0.2                | 47.2               | <0.1                       | 0                  | 0                  | 0                          | 0                  | <0.1               | 0.5                | 84.3               | <0.1               | 0                          | 0                  | 0                  | 0                   | 0                  | 0                  | 0         |
| <b>Echinodermata</b>       |                            |                    |                    |                            |                    |                    |                            |                    |                    |                    |                    |                    |                            |                    |                    |                     |                    |                    |           |
| Ophiuroidea                | <0.1                       | 0.2                | 47.2               | <0.1                       | 0                  | 0                  | 0                          | 0                  | <0.1               | 0.5                | 84.3               | <0.1               | 0                          | 0                  | 0                  | 0                   | 0                  | 0                  | 0         |

**Table 3.** Univariate measures of macrofaunal community structure associated with *Ridgeia piscesae* tubeworm bushes on the Grotto edifice: Sample Surface Area (SSA), Tube Height (TH), Tube Diameter (TD), volume (V), species richness (S), exponential of Shannon entropy (D), Simpson's diversity index ( $1-\lambda'$ ) and Pielou's evenness ( $J'$ ).

| Sample | SSA (m <sup>2</sup> ) | TH (cm) ± sd | TD (cm) ± sd | TSA (m <sup>2</sup> ) | V (m <sup>3</sup> )  | S  | D     | 1-λ'  | J'    |
|--------|-----------------------|--------------|--------------|-----------------------|----------------------|----|-------|-------|-------|
| S1     | 0.12                  | 17.14 ± 6.83 | 4.72 ± 0.82  | 4.27                  | 0.02                 | 28 | 5.377 | 0.728 | 0.505 |
| S2     | 0.06                  | 5.32 ± 2.47  | 2.24 ± 0.42  | 1.63                  | 3.4×10 <sup>-3</sup> | 24 | 5.398 | 0.749 | 0.531 |
| S3     | 0.12                  | 19.91 ± 9.31 | 5.48 ± 1.13  | 4.26                  | 0.02                 | 31 | 6.053 | 0.778 | 0.524 |
| S4     | 0.02                  | 7.15 ± 2.45  | 2.48 ± 0.57  | 0.57                  | 1.1×10 <sup>-3</sup> | 19 | 2.605 | 0.55  | 0.325 |
| S5     | 0.02                  | 3.46 ± 0.85  | 1.91 ± 0.34  | 0.10                  | 5.4×10 <sup>-4</sup> | 19 | 4.348 | 0.697 | 0.499 |
| S6     | 0.01                  | 6.15 ± 2.80  | 2.14 ± 0.43  | 0.18                  | 7.5×10 <sup>-3</sup> | 14 | 3.998 | 0.633 | 0.525 |
